# Supplementary material
Source: PubMed Central journal article supplement (PMC1458792)

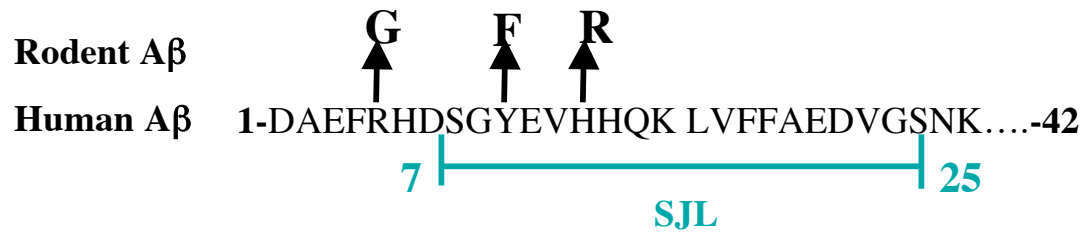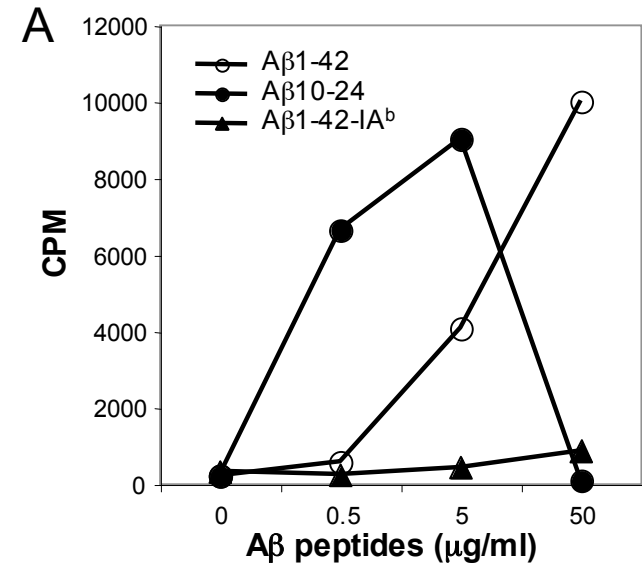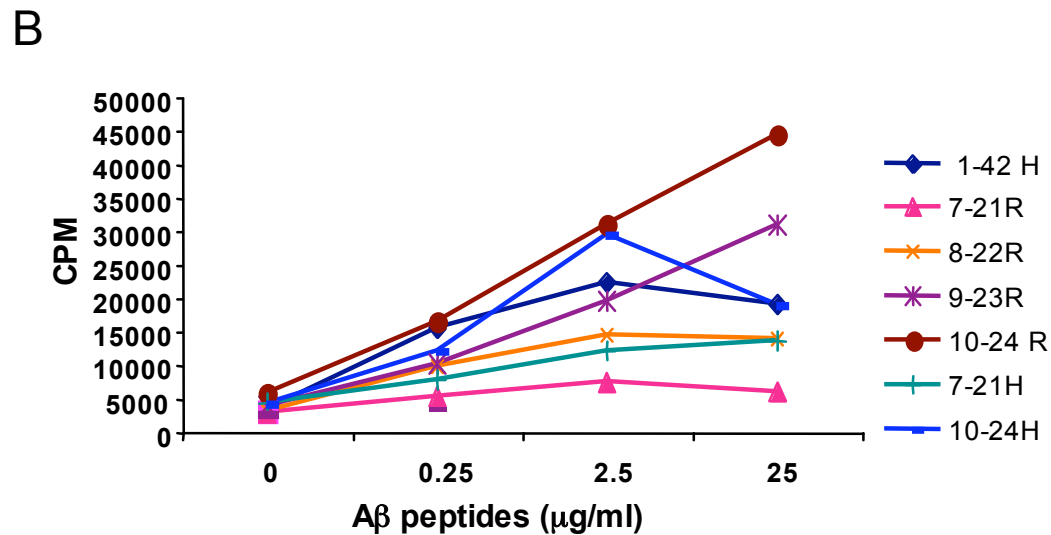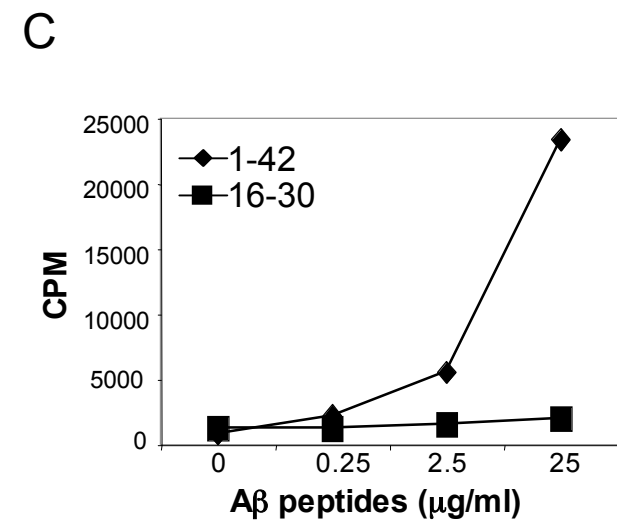

Supplement: pnas_0506209103_1.pdf [file pnas_0506209103_1.pdf]

**A****CD4**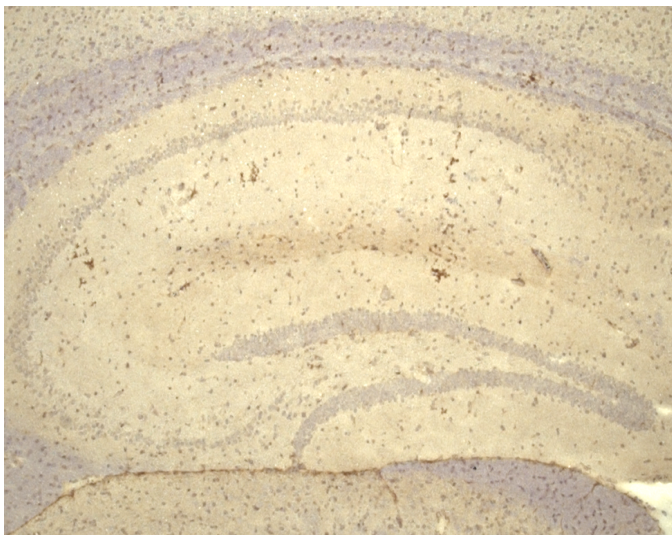**MHC II**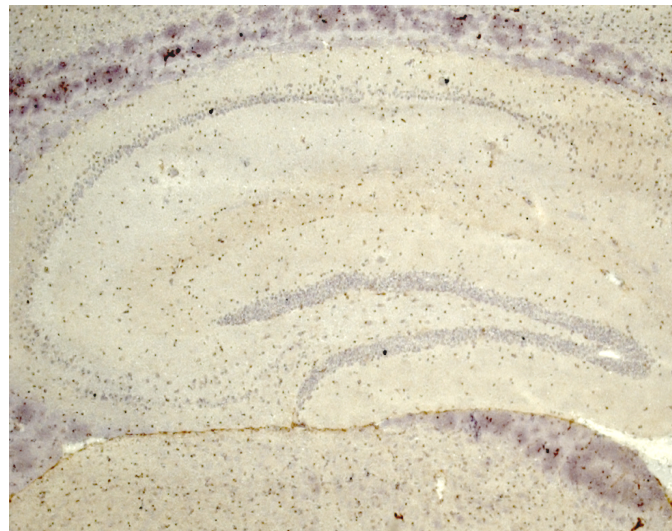**B****CD4**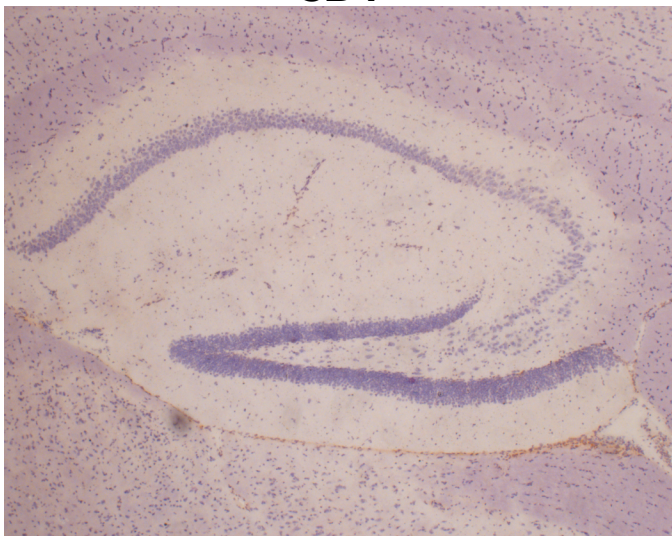**CD11b**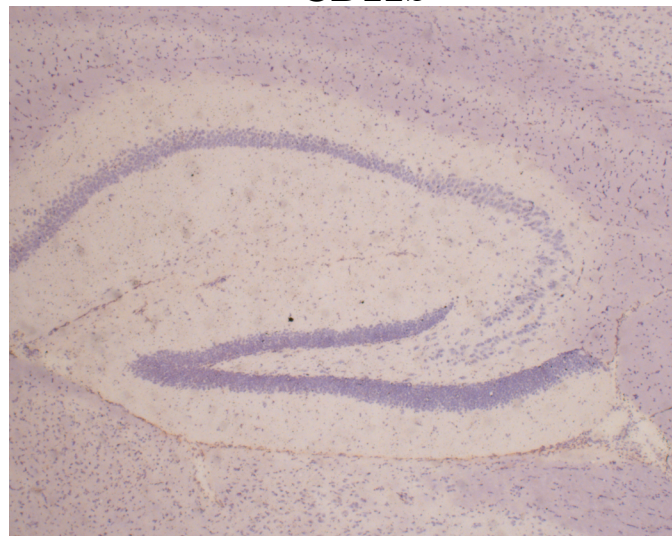

Supplement: pnas_0506209103_2.pdf [file pnas_0506209103_2.pdf]

**A****- IFN- $\gamma$** 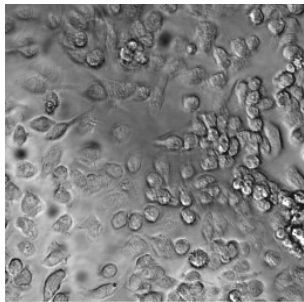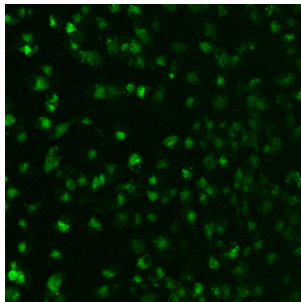**+ IFN- $\gamma$** 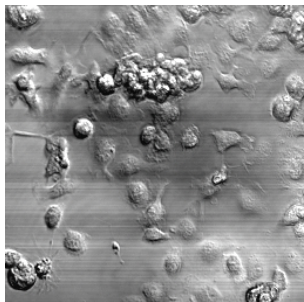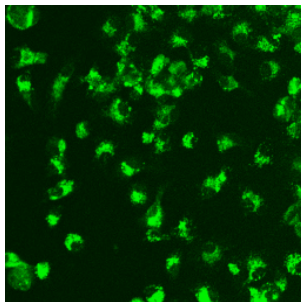**B**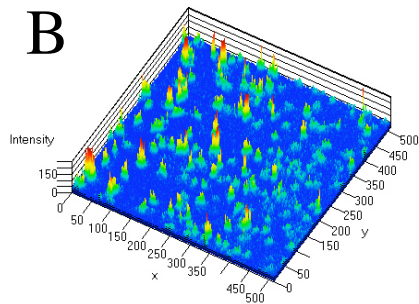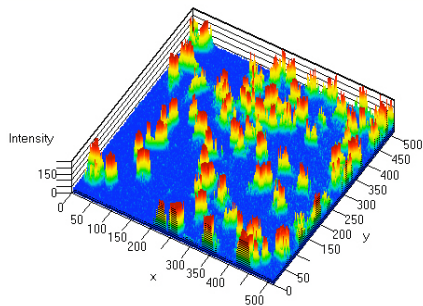**C**

untreated

IFN- $\gamma$  treated $\Sigma t_0 \dots t_n$ 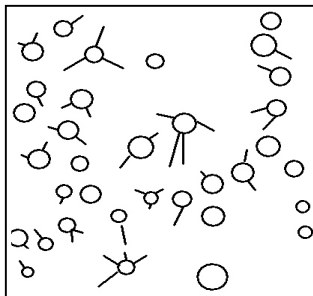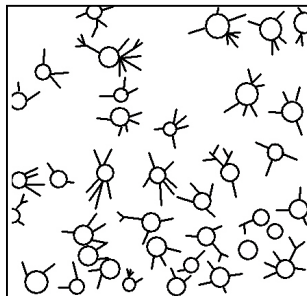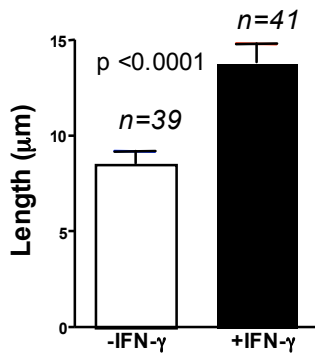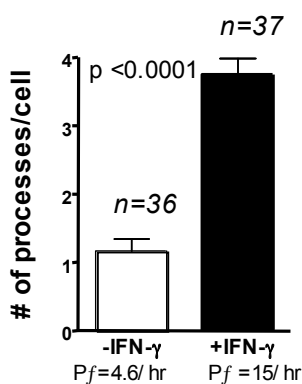

Supplement: pnas_0506209103_4.pdf [file pnas_0506209103_4.pdf]

**A**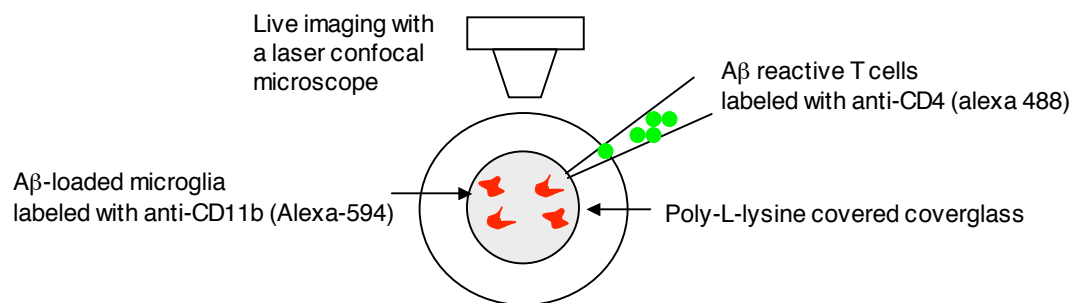**Untreated microglia**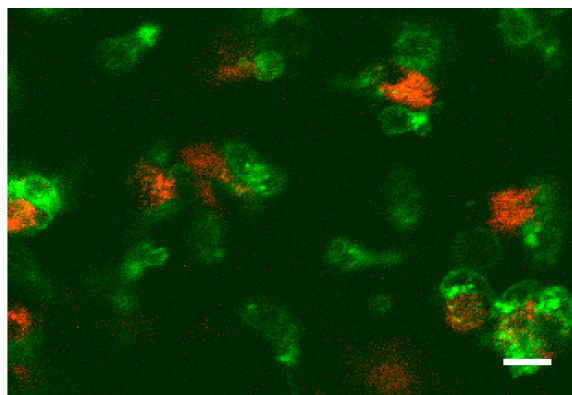**IFN- $\gamma$ -treated microglia**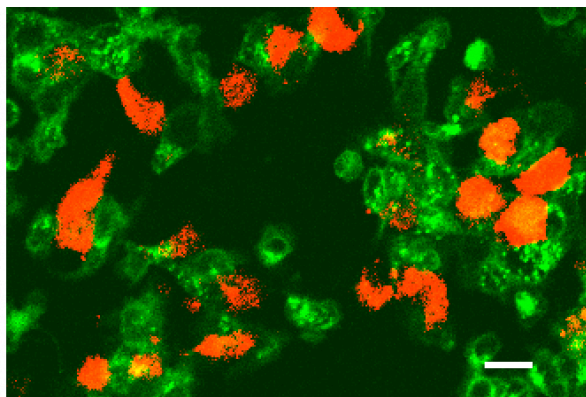**CD11b**  
**CD4****B**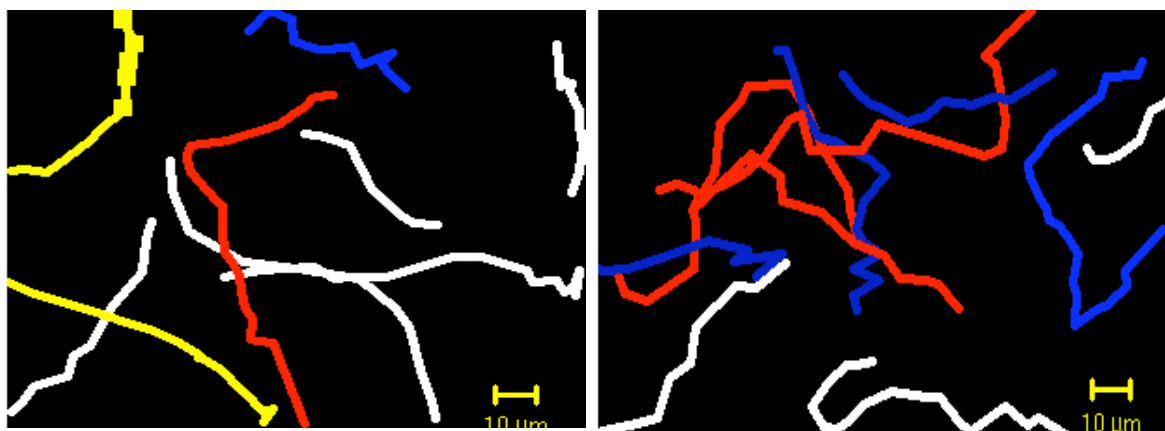

**C**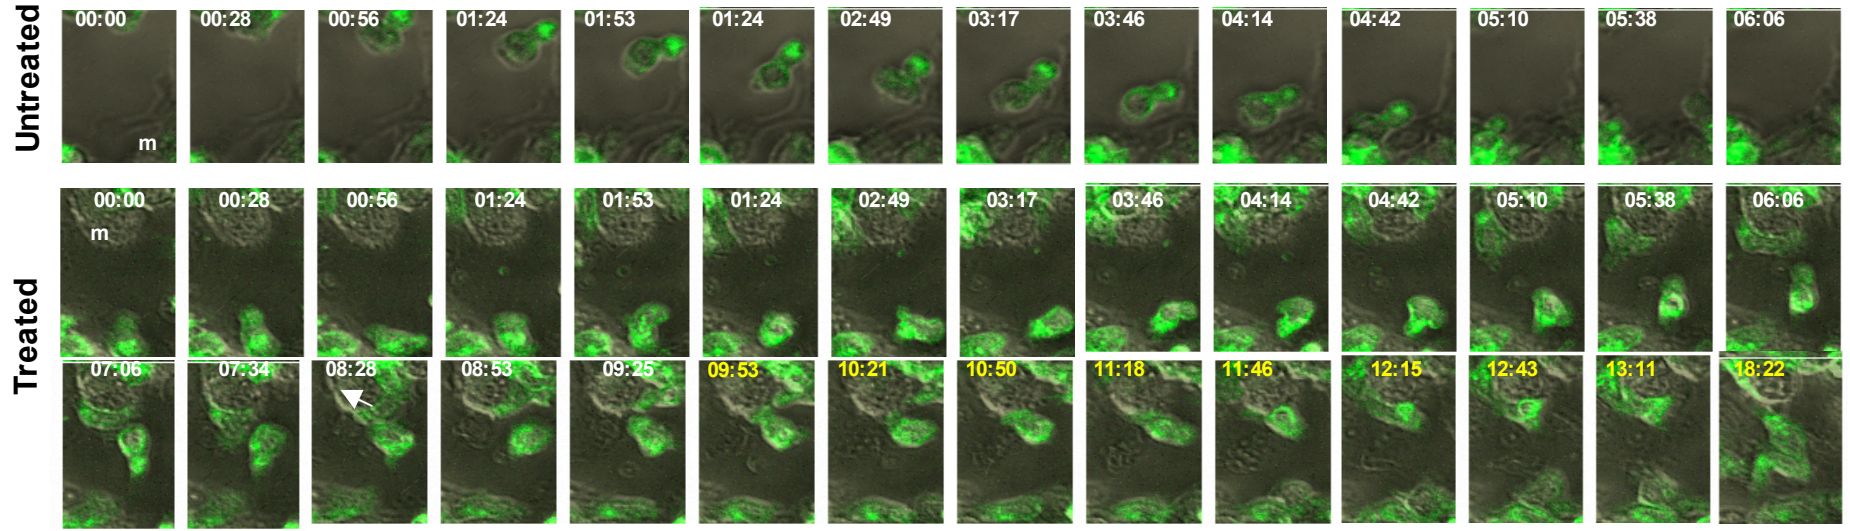**D**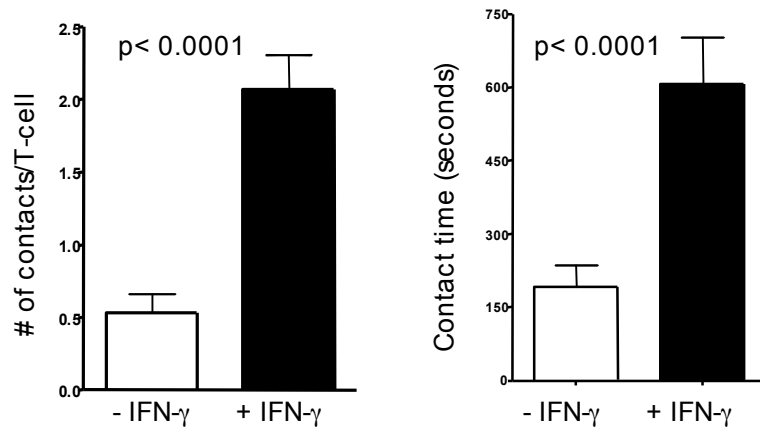

Supplement: pnas_0506209103_5.pdf [file pnas_0506209103_5.pdf]
